# Supplementary material for: 4-Chloro-2 H -chromene-3-carbaldehyde: a valid scaffold in organic synthesis and future molecules for healthcare and energy
Source: Royal Society of Chemistry journal article supplement (doi:10.1039/d5ob01889g), 2025-12-17
Supplement: d5ob01889g1.pdf [file d5ob01889g1.pdf]

There is no supplementary information available for this article.
